# Supplementary material
Source: MDPI journal article supplement (https://www.mdpi.com/2076-3417/13/2/922)
Supplement: s1 [file s1]

Archive with 3 entries (3 files):
- Supplementary file 1.pdf
- Supplementary file 2.pdf
- Supplementary file 3.pdf
