# Supplementary material
Source: MDPI journal article supplement (https://www.mdpi.com/2076-3417/13/2/922)
Supplement: s1 [file s1 › Supplementary file 3.pdf]

## Orthodontie

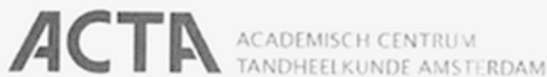

Gustav Mahlerlaan 3004, 1081 LA Amsterdam

Tel: 020- 5980610 / 5980611

UW geboorte datum:

geslacht M/V

NAAM van uw behandelaar:

ESASnummer:

<https://esas.nu/>

### Patiënten enquête Esas 2019 2020

datum : 22 / 01 / 2020

Geachte ouders en patiënt(e),

Wij doen ons best om op een prettige manier goede orthodontische zorg te verlenen, rekening houdend met de wensen en de verwachtingen van onze patiënten. Om na te gaan of dat lukt, worden zowel patiënten als ouders verzocht hun mening over onze afdeling te geven, via het invullen van deze enquête. Met de resultaten hiervan kunnen wij werken aan verbetering van onze zorgverlening. U hoeft uw naam niet te vermelden, want het onderzoek is gegarandeerd anoniem. Wij stellen het bijzonder op prijs als ook u hieraan wilt meewerken, het duurt slecht enkele minuten. Bij voorbaat hartelijk dank voor uw moeite en tijd om onze praktijkorganisatie mede door uw input te verbeteren.

| A Over de orthodontist                                           | niet waar ← → wel waar                                                                                                   |
|------------------------------------------------------------------|--------------------------------------------------------------------------------------------------------------------------|
| 1. Is vriendelijk en goed aanspreekbaar                          | <input type="radio"/> <input type="radio"/> <input type="radio"/> <input type="radio"/> <input checked="" type="radio"/> |
| 2. Houdt me goed op de hoogte van het verloop van de behandeling | <input type="radio"/> <input type="radio"/> <input type="radio"/> <input type="radio"/> <input checked="" type="radio"/> |
| 3. Heeft mijn volledige vertrouwen                               | <input type="radio"/> <input type="radio"/> <input type="radio"/> <input type="radio"/> <input checked="" type="radio"/> |
| 4. Geeft mij alle informatie die ik nodig heb                    | <input type="radio"/> <input type="radio"/> <input type="radio"/> <input type="radio"/> <input checked="" type="radio"/> |
| 5. Neemt de tijd voor me                                         | <input type="radio"/> <input type="radio"/> <input type="radio"/> <input type="radio"/> <input checked="" type="radio"/> |
| 6. Luistert naar wat ik te zeggen heb                            | <input type="radio"/> <input type="radio"/> <input type="radio"/> <input type="radio"/> <input checked="" type="radio"/> |
| 7. Is helder en duidelijk                                        | <input type="radio"/> <input type="radio"/> <input type="radio"/> <input type="radio"/> <input checked="" type="radio"/> |
| 8. Gaat goed om met mensen                                       | <input type="radio"/> <input type="radio"/> <input type="radio"/> <input type="radio"/> <input checked="" type="radio"/> |
| 9. Werkt netjes op tijd                                          | <input type="radio"/> <input type="radio"/> <input type="radio"/> <input type="radio"/> <input checked="" type="radio"/> |
| 10. Is goed in wat hij/zij doet                                  | <input type="radio"/> <input type="radio"/> <input type="radio"/> <input type="radio"/> <input checked="" type="radio"/> |

  

| B Over de praktijkmedewerk(st)ers | niet waar ← → wel waar                                                                                                   |
|-----------------------------------|--------------------------------------------------------------------------------------------------------------------------|
| 11. Zijn vriendelijk              | <input type="radio"/> <input type="radio"/> <input type="radio"/> <input type="radio"/> <input checked="" type="radio"/> |
| 12. Zijn zorgzaam en plezierig    | <input type="radio"/> <input type="radio"/> <input type="radio"/> <input type="radio"/> <input checked="" type="radio"/> |

## Orthodontie

|                                                            |                                                                                                                          |
|------------------------------------------------------------|--------------------------------------------------------------------------------------------------------------------------|
| 13. Vormen een goed team                                   | <input type="radio"/> <input type="radio"/> <input type="radio"/> <input type="radio"/> <input checked="" type="radio"/> |
| 14. Zijn goed in wat zij doen                              | <input type="radio"/> <input type="radio"/> <input type="radio"/> <input type="radio"/> <input checked="" type="radio"/> |
| 15. De telefoon wordt prompt beantwoord                    | <input type="radio"/> <input type="radio"/> <input type="radio"/> <input type="radio"/> <input checked="" type="radio"/> |
| 16. Afspraken maken gaat gemakkelijk en snel               | <input type="radio"/> <input type="radio"/> <input type="radio"/> <input type="radio"/> <input checked="" type="radio"/> |
| <b>C Over de praktijk</b>                                  |                                                                                                                          |
| 17. De praktijk ziet er goed uit                           | <input type="radio"/> <input type="radio"/> <input type="radio"/> <input type="radio"/> <input checked="" type="radio"/> |
| 18. De wachtkamer is aangenaam                             | <input type="radio"/> <input type="radio"/> <input checked="" type="radio"/> <input type="radio"/> <input type="radio"/> |
| 19. Er zijn altijd voldoende nieuwe tijdschriften aanwezig | <input type="radio"/> <input type="radio"/> <input checked="" type="radio"/> <input type="radio"/> <input type="radio"/> |
| 20. De praktijk is goed bereikbaar                         | <input type="radio"/> <input type="radio"/> <input type="radio"/> <input checked="" type="radio"/> <input type="radio"/> |
| <b>D Over de behandeling</b>                               | <b>niet waar ← → wel waar</b>                                                                                            |
| 21. Ik heb nooit iets echt vervelends ervaren              | <input type="radio"/> <input type="radio"/> <input type="radio"/> <input type="radio"/> <input checked="" type="radio"/> |
| 22. Het eindresultaat is zoals ik had verwacht             | <input type="radio"/> <input type="radio"/> <input type="radio"/> <input type="radio"/> <input checked="" type="radio"/> |
| 23. De behandeling duurde net zo lang als was voorspeld    | <input type="radio"/> <input type="radio"/> <input type="radio"/> <input checked="" type="radio"/> <input type="radio"/> |
| 24. Mijn tanden zijn heel mooi geworden                    | <input type="radio"/> <input type="radio"/> <input type="radio"/> <input type="radio"/> <input checked="" type="radio"/> |
| <b>E Tenslotte</b>                                         |                                                                                                                          |
| 25. Ik zal deze praktijk aan mijn vrienden aanbevelen      | <input type="radio"/> <input type="radio"/> <input type="radio"/> <input checked="" type="radio"/>                       |

**Supplementary file 3.** ESAS patient satisfaction evaluation part
