# Supplementary material
Source: MDPI journal article supplement (https://www.mdpi.com/2076-3417/13/2/922)

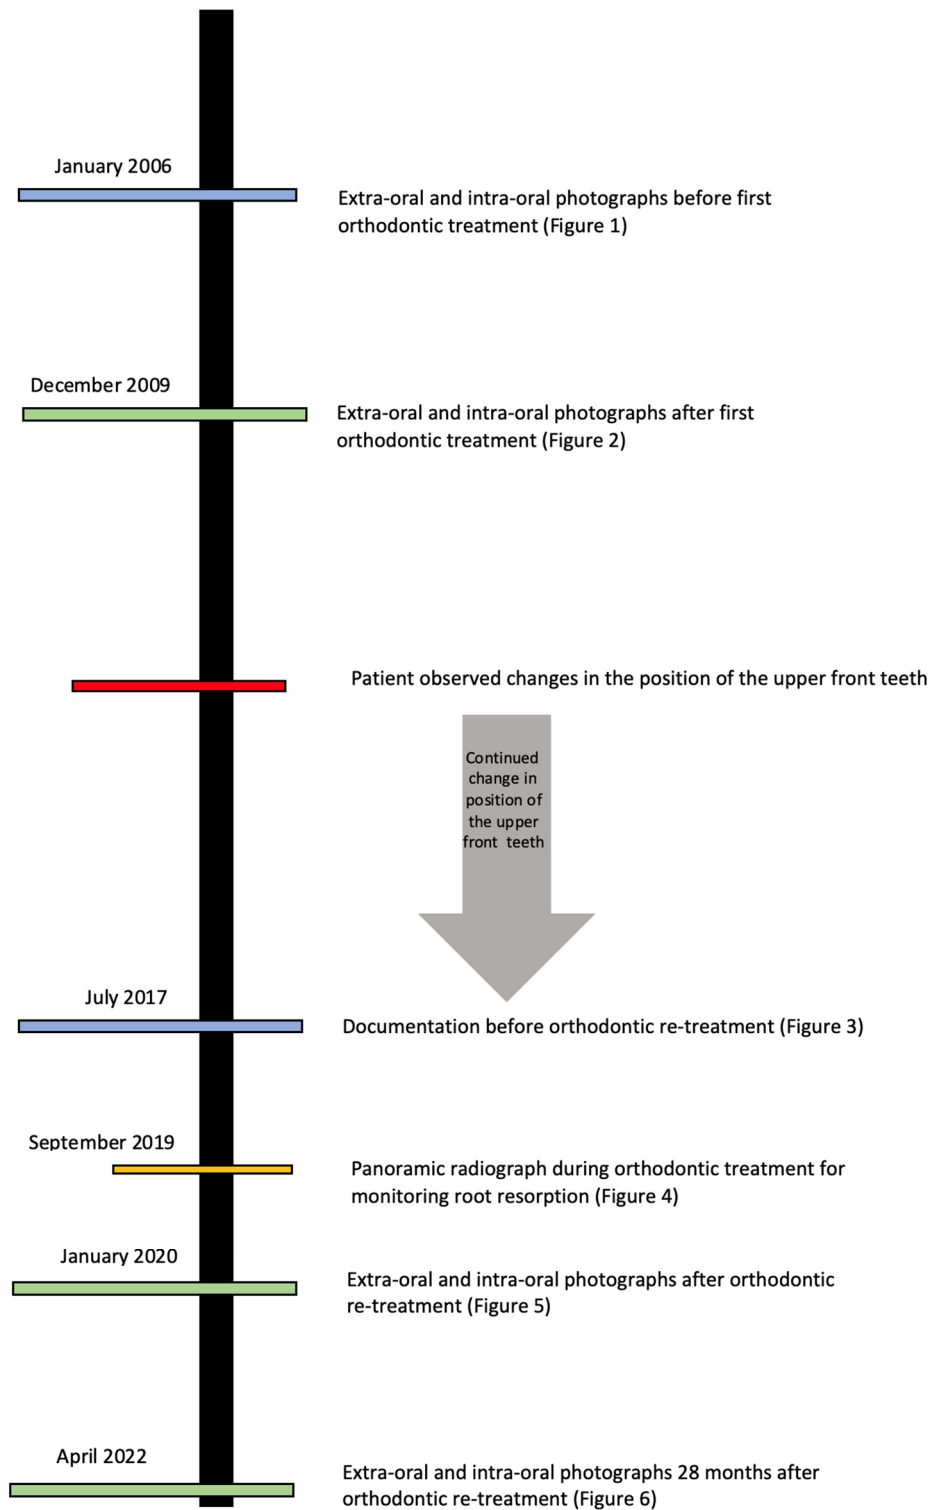

**Supplementary file 2. Timeline**

Supplement: s1 [file s1]
